# Supplementary material for: Mesoporous lithium vanadium oxide as a thin film electrode for lithium-ion batteries: comparison between direct synthesis of LiV2O5 and electrochemical lithium intercalation in V2O5
Source: Royal Society of Chemistry journal article supplement (doi:10.1039/c4ta00090k), 2014-01-01
Supplement: c4ta00090k1.pdf [file c4ta00090k1.pdf]

### Mesoporous Lithium Vanadium Oxide as Thin Film Electrode for Lithium-Ion Batteries: Comparison between Direct Synthesis of $\text{LiV}_2\text{O}_5$ and Electrochemical Lithium Intercalation in $\text{V}_2\text{O}_5$ – Supplementary Informations

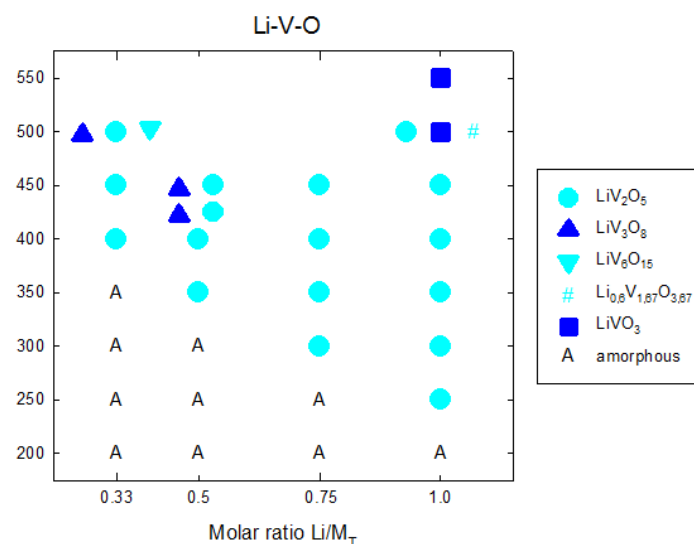

**Fig. S1** X-Ray Diffraction (XRD) summary of crystalline phases obtained for different Li/V molar ratio in function of the temperature.

**X-Ray Photoelectron Spectroscopy (XPS)** data and spectra were carry out in a Kratos Axis Ultra spectrometer equipped with a monochromatized aluminium X-ray source powered at 10 mA and 15 kV; calibration of the binding energy scale was set by fixing the C-(C,H) peak at 284.8 eV; special care was taken to avoid vanadium reduction under vacuum.

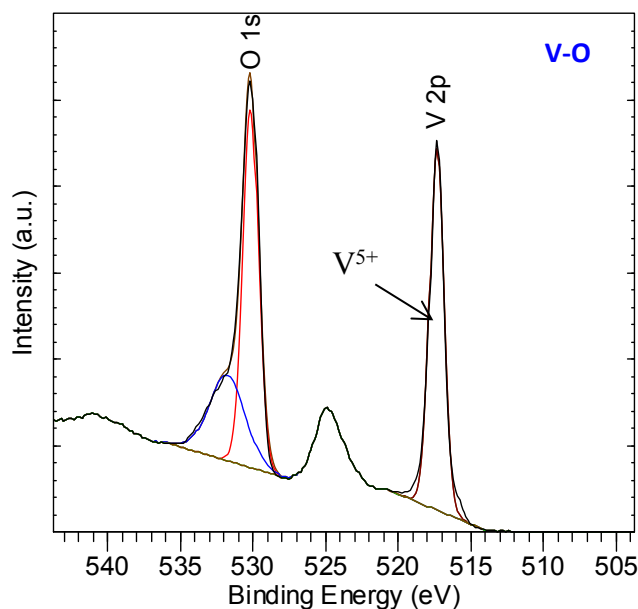

**Fig. S2** X-Ray Photoelectron Spectroscopy (XPS) spectra of V-O (350°C-30min) MTFs.

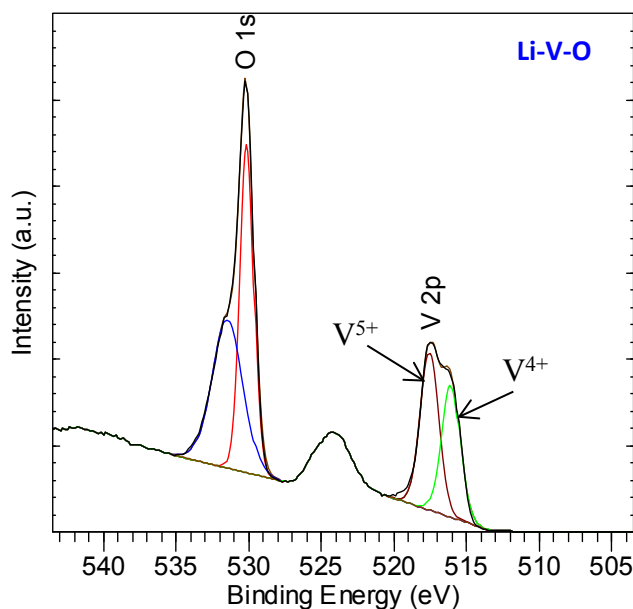

**Fig. S3** X-Ray Photoelectron Spectroscopy (XPS) spectra of Li-V-O (400°C-1min) MTFs.

**Table S1.** X-Ray Photoelectron Spectroscopy (XPS) data of Li-V-O (400°C-1min) MTFs and V-O (350°C-30min) MTFs.

|                         | V <sup>4+</sup> (%) | V <sup>5+</sup> (%) |
|-------------------------|---------------------|---------------------|
| Li-V-O (400°C-1min) (1) | 46                  | 54                  |
| Li-V-O (400°C-1min) (2) | 43                  | 57                  |
| V-O (350°C-30min)       | 0                   | 100                 |

**Grazing Incidence Small Angle X-Ray Scattering (GISAXS)** horizontal line profiles were performed at beam line 7.3.3 at the Advanced Light Source, Lawrence Berkeley National Technology, using an X-Ray of 0.123984 nm wavelength. An ADSC Quantum 4R detector was used and the detector distance set at 3.8 meters.

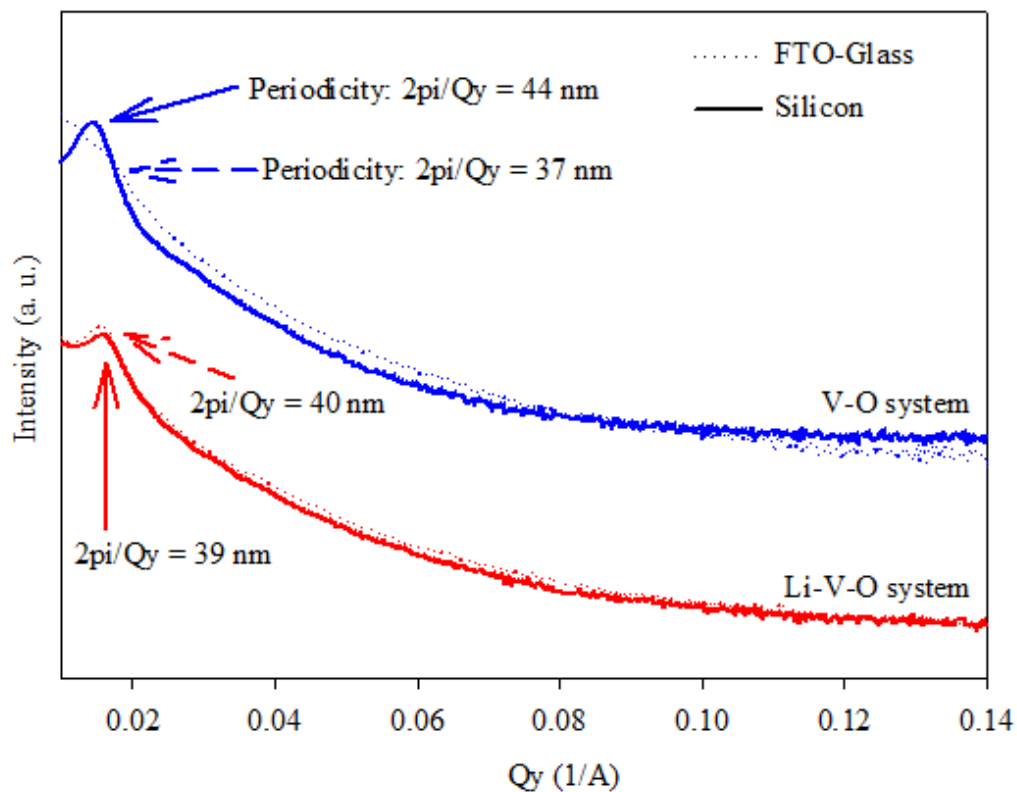

**Fig. S4** Grazing Incidence Small Angle X-Ray Scattering (GISAXS) horizontal line profiles of V-O and Li-V-O films deposited on silicon and FTO-Glass substrates.

**Scanning Electron Micrographs** were recorded on a Zeiss Gemini Ultra-55 Analytical Scanning Electron Microscope using a beam energy of 5 kV and an In-Lens detector.

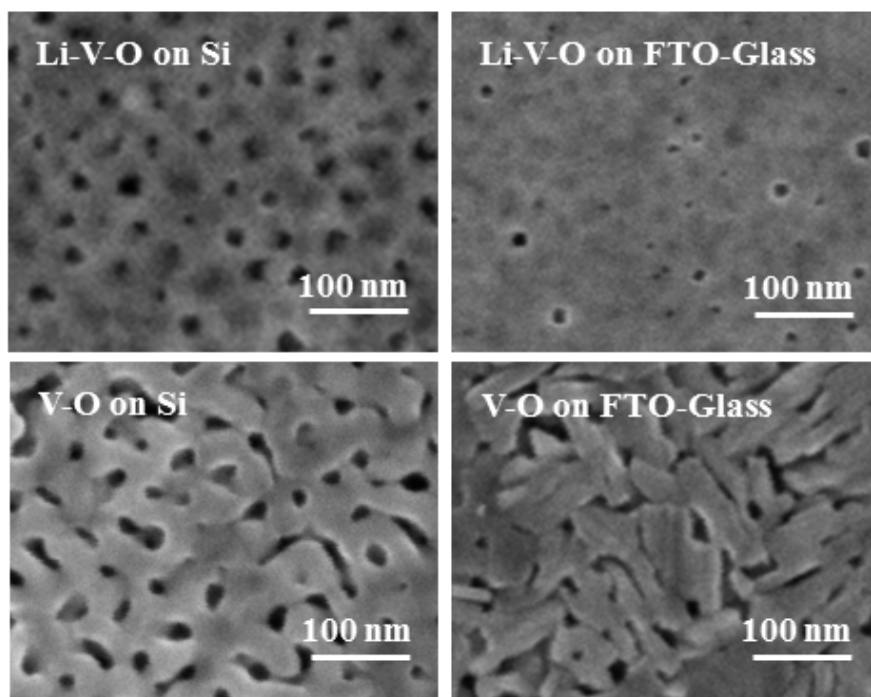

**Fig. S5** SEM micrographs of the surface of Li-V-O and Li-V-O deposited on silicon and FTO-glass substrate.

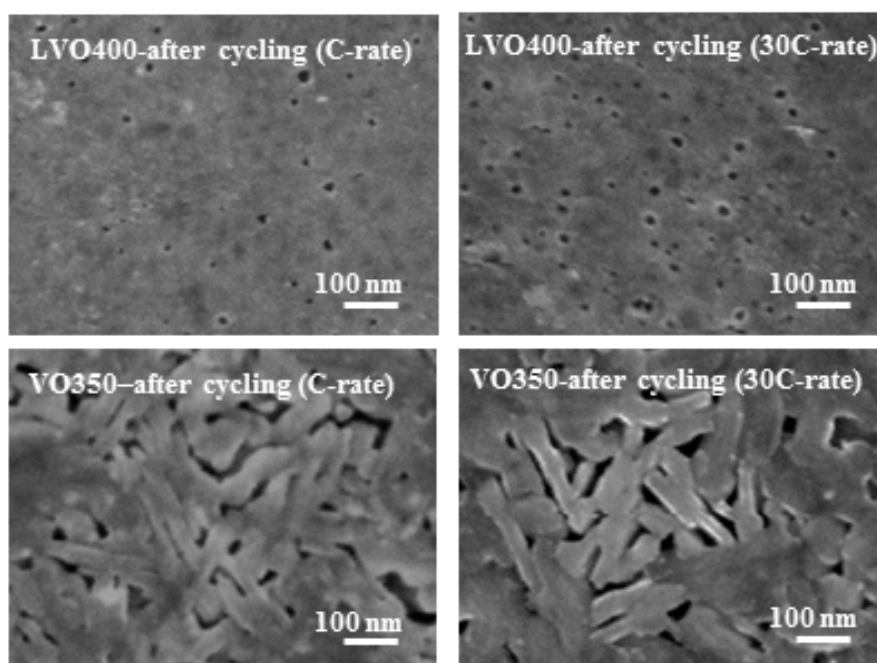

**Fig. S6** SEM micrographs of the surface of VO350 and LVO400 after electrochemical cycling.
